# Supplementary material
Source: publisher site journal article supplement (https://www.dovepress.com/article/348786)
Supplement: Supplementary file 1 [file get_supplementary_file.php]

## **Supplementary Information**

# **TLR3 Expression is a Potential Prognosis Biomarker and Shapes the Immune-Active Tumor Microenvironment in Esophageal Squamous Cell Carcinoma**

Ruibing Su<sup>¶</sup>, Lijun Cai<sup>¶</sup>, Pan Xiong<sup>¶</sup>, Zhiwei Liu<sup>¶</sup>, Shaobin Chen, Xi Liu, Runhua Lin, Zhijin Lei,  
Dongping Tian, Min Su\*

\* Corresponding author: Min Su

E-mail: minsu@stu.edu.cn

<sup>¶</sup>These authors contributed equally to this work.

This file includes:

Supplementary Figure 1 to 7

Supplementary Table 1 to 2

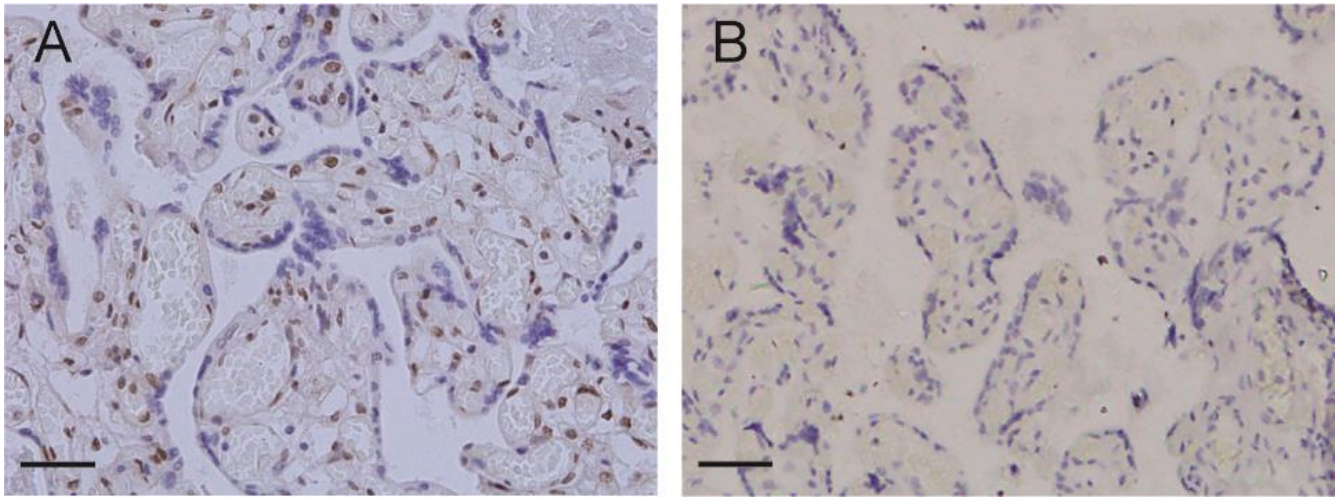

**Figure S1. Representative IHC images of controls of placental tissues. (A) Positive control. (B) Negative control using normal mouse IgG. Scale bars: 40  $\mu$ m.**

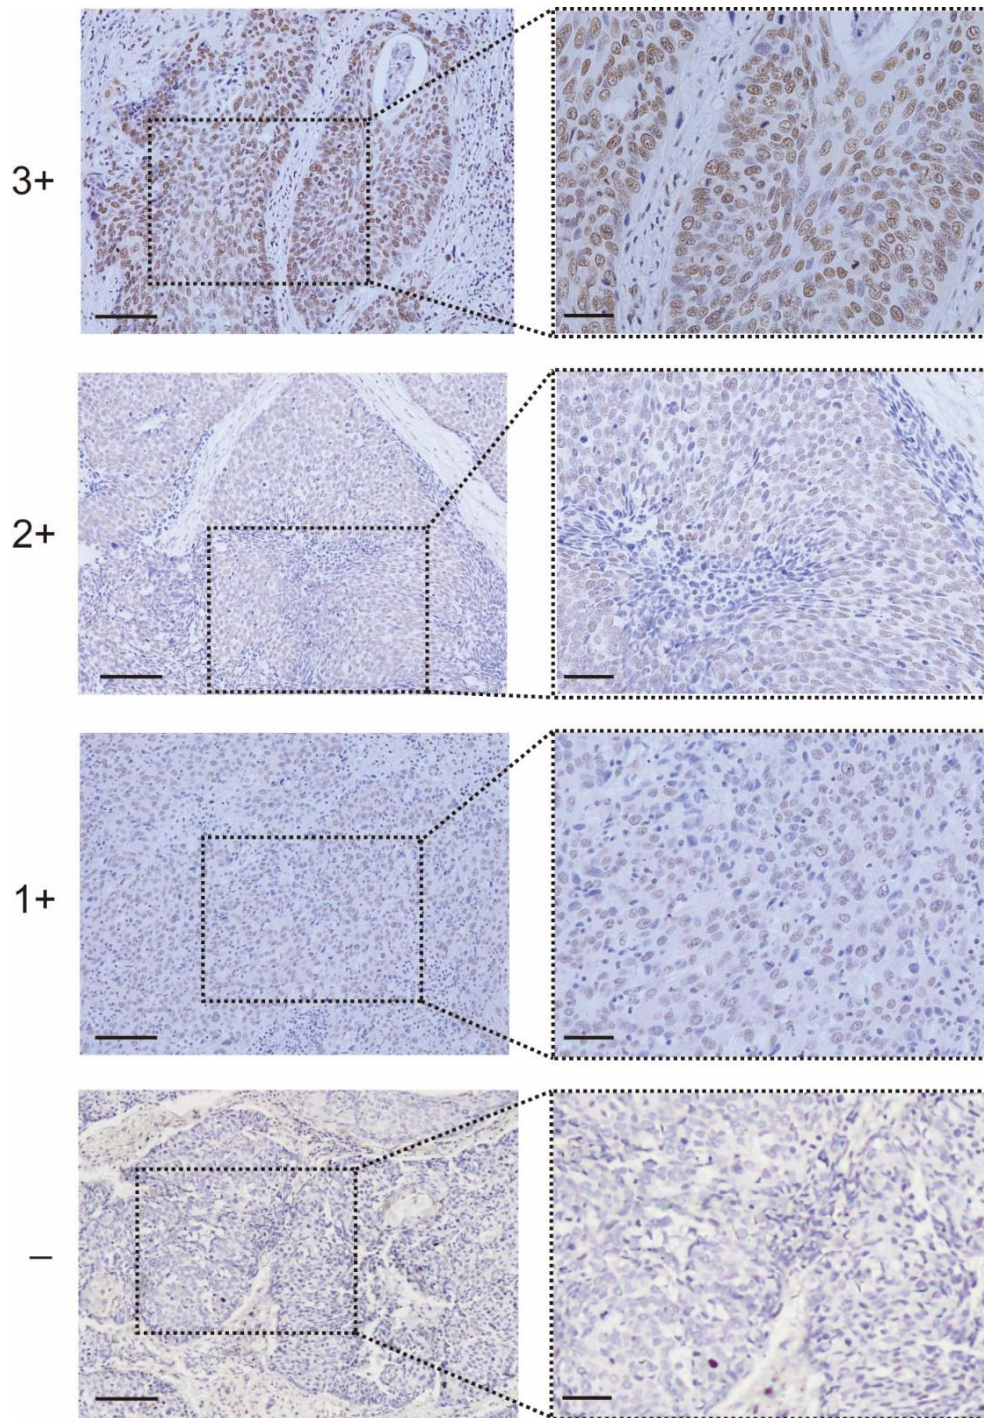

**Figure S2. Representative photomicrographs of TLR3 IHC staining in ESCC tissue show 3+, 2+, 1+, and - scores. Scale bars:100  $\mu\text{m}$  (left side) and 40  $\mu\text{m}$  (right side).**

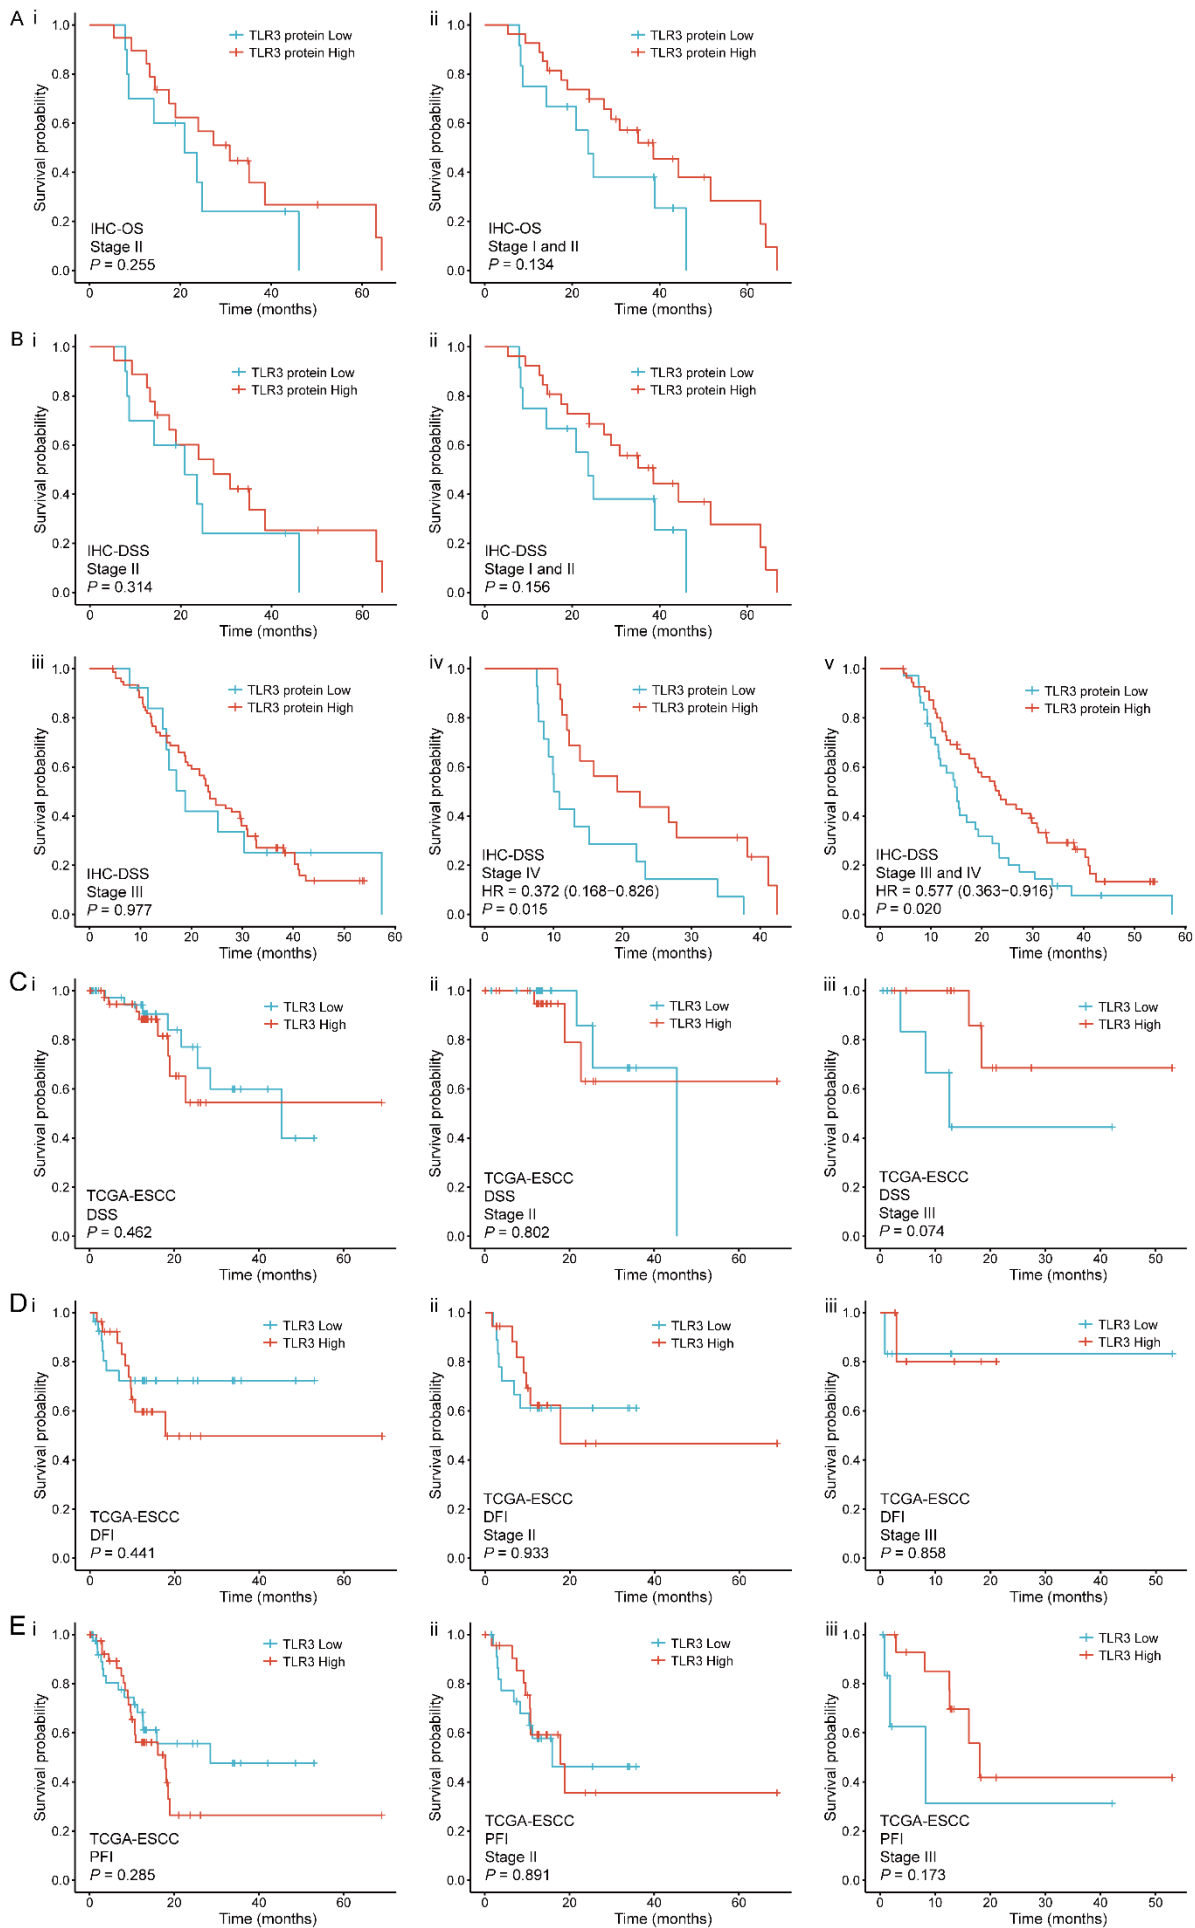

**Figure S3. Survival curves for TLR3 in IHC samples and TCGA.** (A) OS survival curves in TNM stage II (i) and combined stages I and II (ii) for the IHC samples. (B) Survival curves for DSS in TNM stage II (i), combined stages I and II (ii), stage III (iii), stage IV (iv), and combined stages III and IV (v) for the IHC samples. (C) Survival curves for DSS in all data (i), TNM stage II (ii) and stage III (iii) in TCGA-ESCC. (D) Survival curves for DFI in all data (i), TNM stage II (ii) and stage III (iii) in TCGA-ESCC. (E) Survival curves for PFI in all data (i), TNM stage II (ii) and stage III (iii) in TCGA-ESCC.

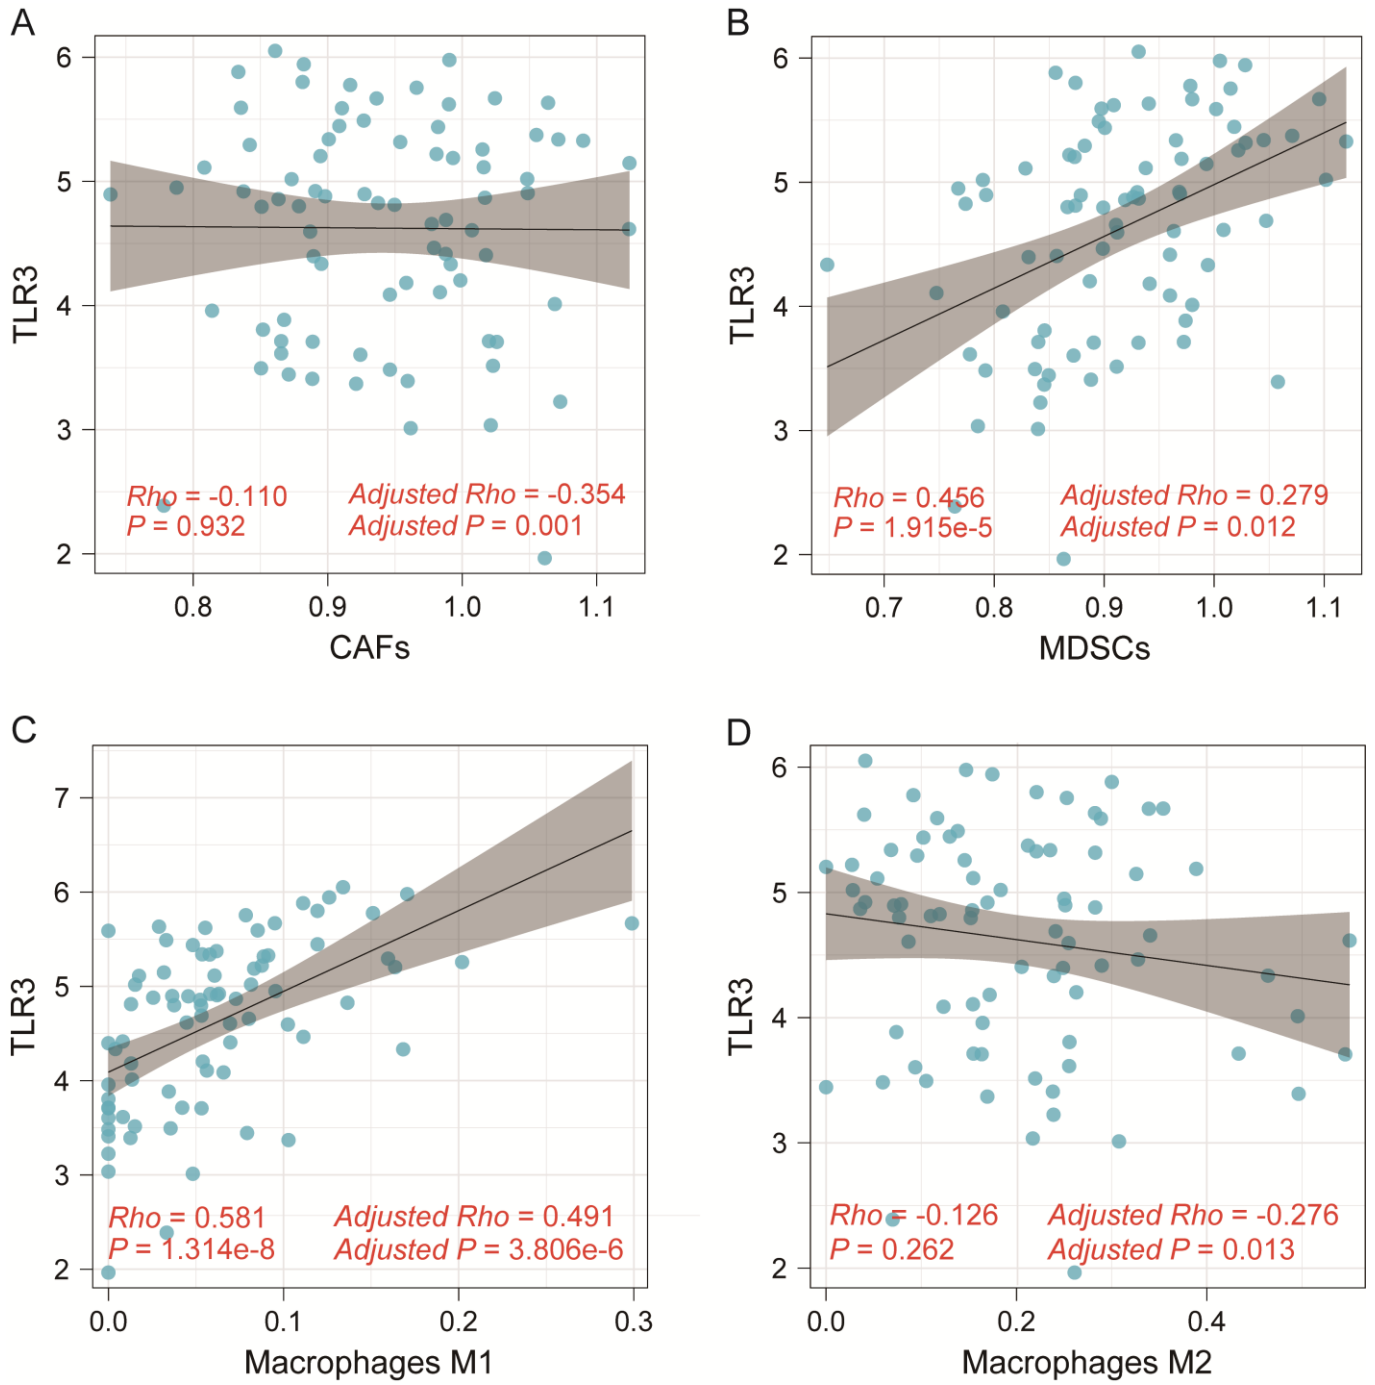

**Figure S4. Correlation between TLR3 expression in CAFs (A), MDSCs (B), M1-type macrophages (C) and M2-type macrophage (D).**

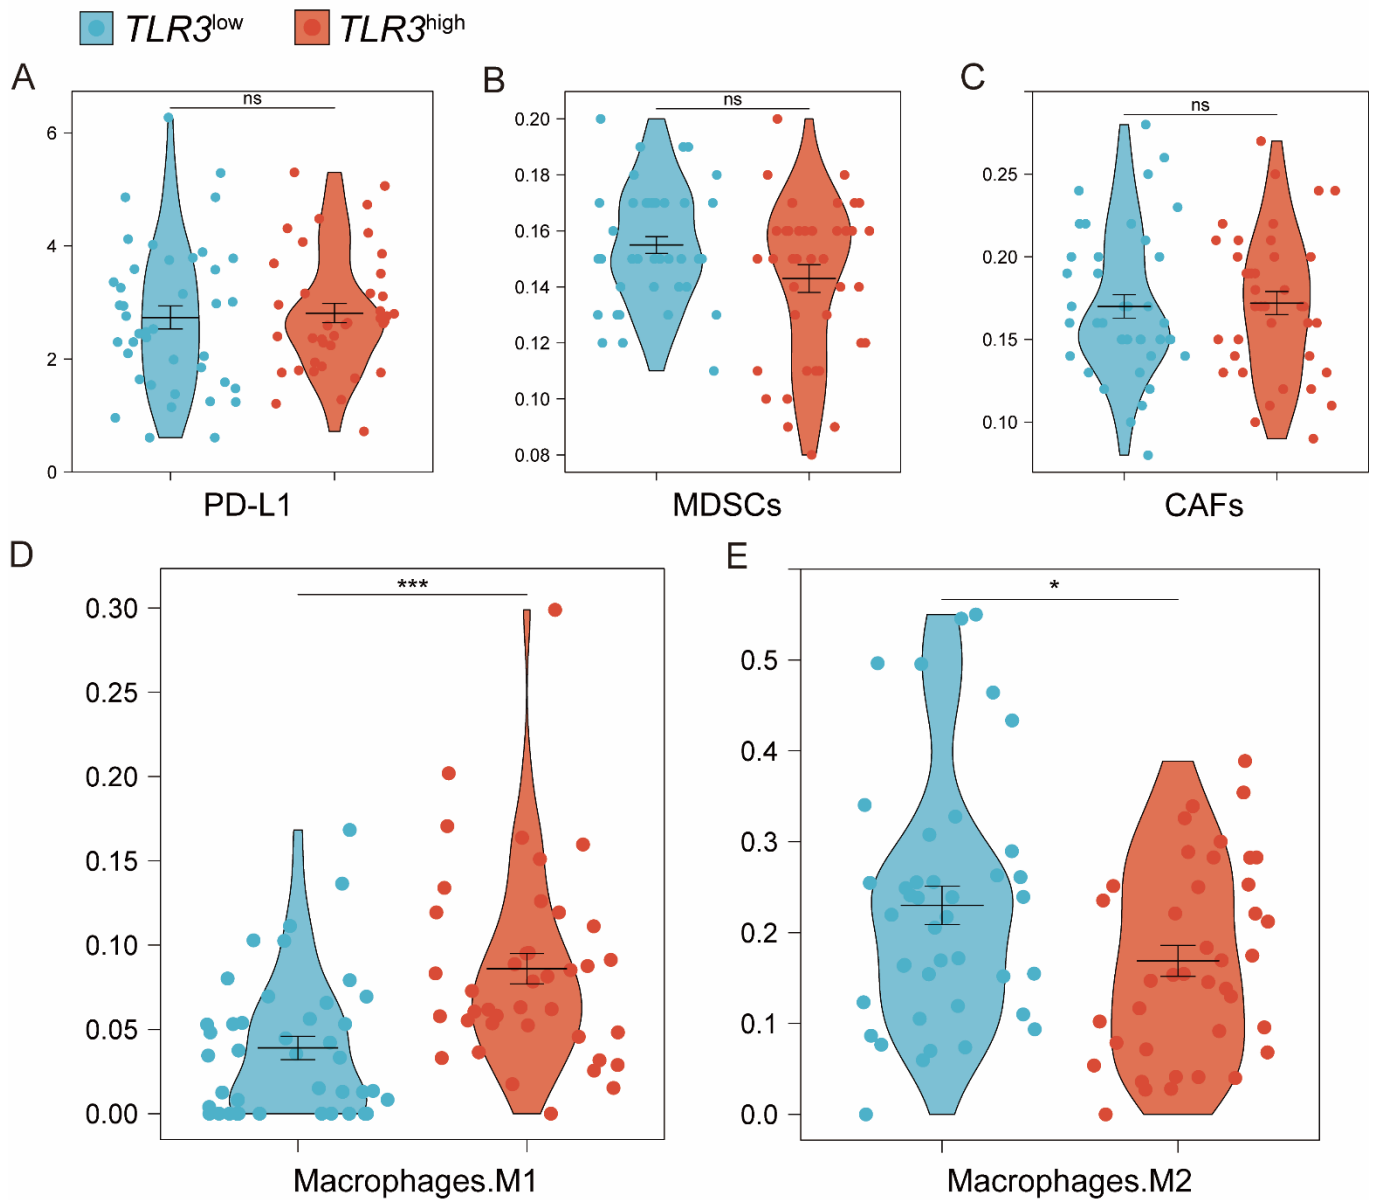

**Figure S5. Violin plot showing difference analysis in PD-L1 (A), CAFs (B), MDSCs (C), M1-type macrophages (D) and M2-type macrophage (E) between  $TLR3^{low}$  and  $TLR3^{high}$  groups. ns, no significance; \* $P < 0.05$ , \*\*\* $P < 0.001$ .**

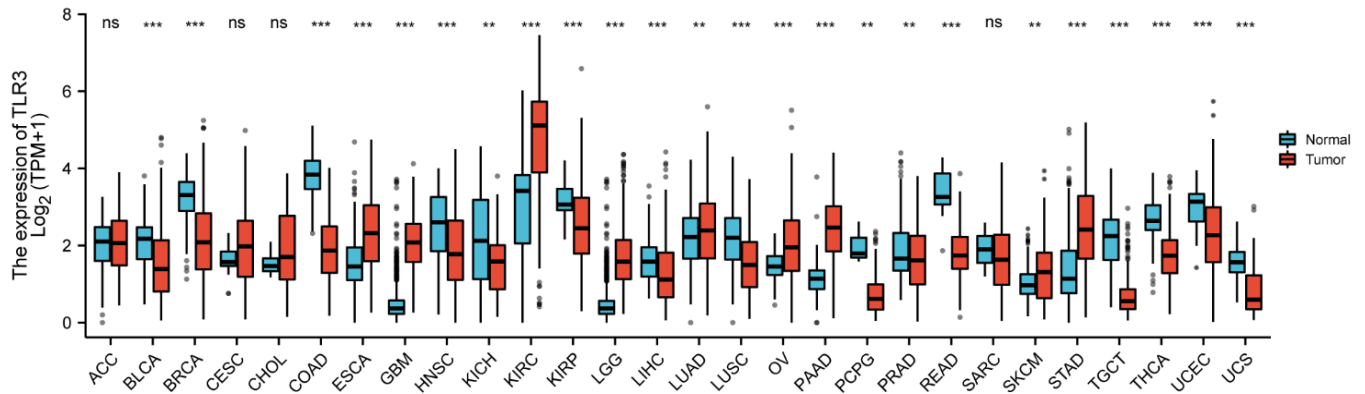

**Figure S6. Expression pattern of *TLR3* in pan-cancer.** The mRNA expression of *TLR3* changed in 24 of 28 cancer types compared with normal tissues, including 9 types showing upregulation and 15 types showing downregulation. ACC, adrenocortical cancer; BLCA, bladder urothelial carcinoma; BRCA, breast invasive carcinoma; CESC, cervical cancer; CHOL, cholangiocarcinoma; COAD, colon adenocarcinoma; ESCA, esophageal cancer; GBM, glioblastoma multiforme; HNSC, head and neck squamous cell carcinoma; KICH, kidney chromophobe; KIRC, kidney renal clear cell carcinoma; KIRP, kidney renal papillary cell carcinoma; LGG, lower grade glioma; LIHC, liver hepatocellular carcinoma; LUAD, lung adenocarcinoma; LUSC, lung squamous cell carcinoma; OV, ovarian cancer; PAAD, pancreatic cancer; PCPG, pheochromocytoma and paraganglioma; PRAD, prostate adenocarcinoma; READ, rectum adenocarcinoma; SARC, sarcoma; SKCM, skin cutaneous melanoma; STAD, stomach adenocarcinoma; TGCT, testicular germ cell tumor; THCA, thyroid carcinoma; UCEC, uterine corpus endometrial carcinoma; UCS, uterine carcinosarcoma. \*\* $P < 0.01$ , \*\*\* $P < 0.001$ ; ns, no significance.



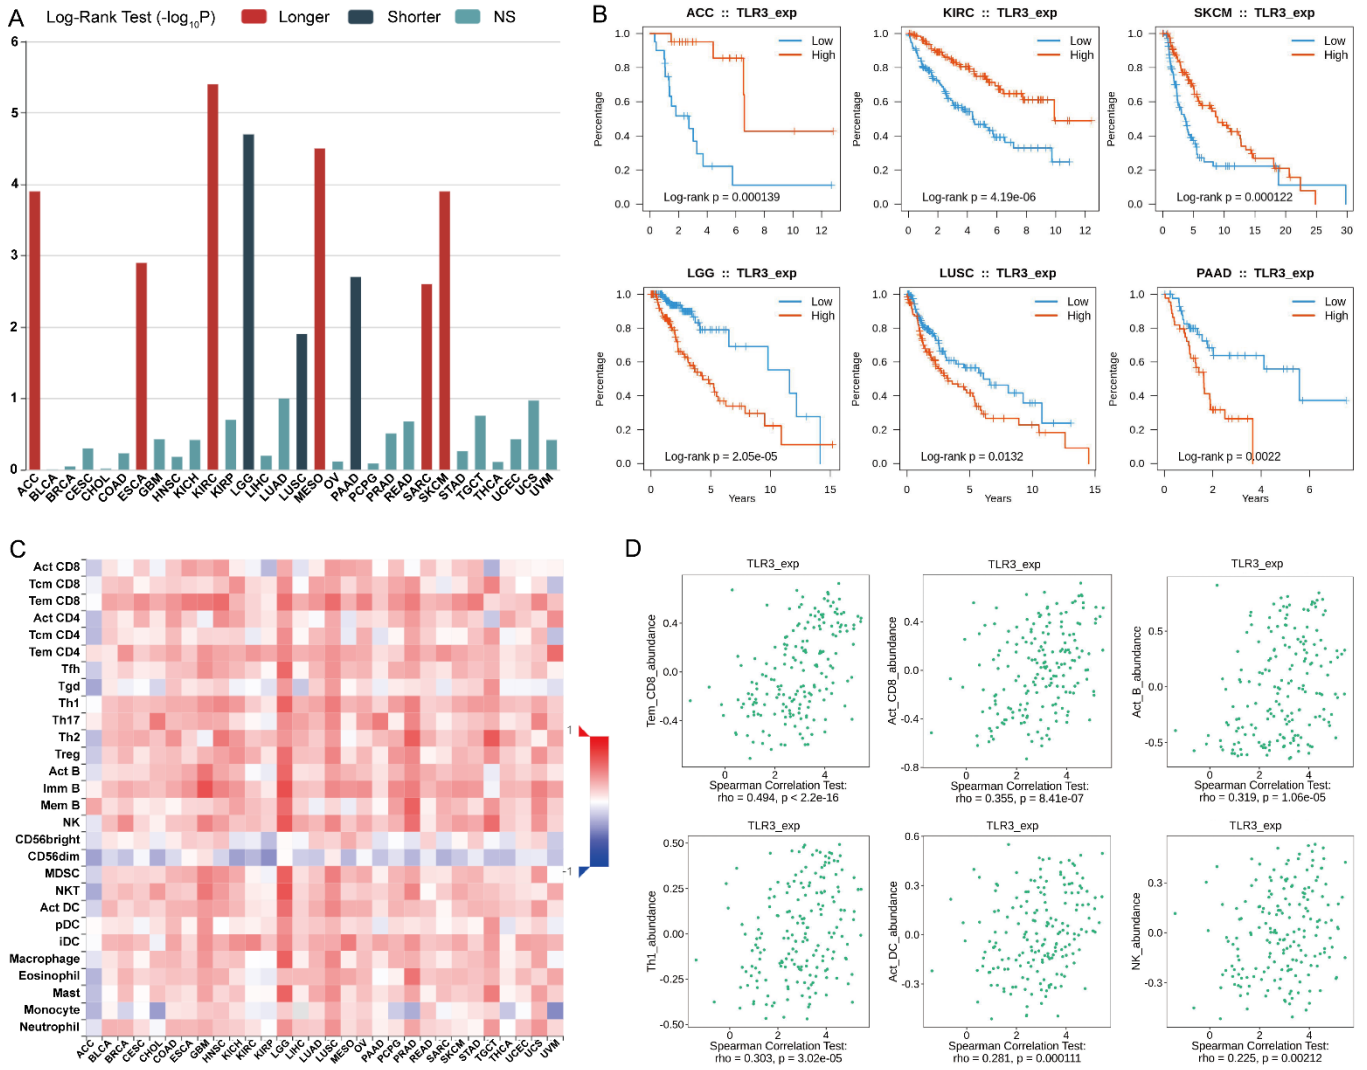

**Figure S7. Associations between *TLR3* expression, OS, and immune infiltration level in pan-cancers.** (A) Associations between *TLR3* expression and OS across human cancers (longer,  $P < 0.05$ , red; shorter,  $P < 0.05$ , cyan-blue; NS, no significant, cyan). (B) Representative survival curves of *TLR3* expression with different cancers, including ACC (adrenocortical cancer), KIRC (kidney renal clear cell carcinoma), SKCM (skin cutaneous melanoma), LGG (lower grade glioma), LUSC (lung squamous cell carcinoma) and PAAD (pancreatic cancer). (C) Relations between the expression of *TLR3* and 28 types of TILs across human cancers. (D) *TLR3* was correlated with the abundance of CD8+ T cells, CD4+ T cells, Th1 cells, DCs, and NK cells.

**Table S1. Detailed clinicopathological parameters in the IHC sample cohort.**

| Patients | Gender | Age | Location | Gross      | size (cm) | Grade | pT | pN | pM | pTNM | Margin | radiotherapy | chemotherapy | OS | DSS | Survival time (months) |
|----------|--------|-----|----------|------------|-----------|-------|----|----|----|------|--------|--------------|--------------|----|-----|------------------------|
| 1        | M      | 58  | Mid      | Medullary  | 6.0       | I     | T4 | N0 | M0 | -    | R0     | NA           | NA           | 1  | 1   | 11.60                  |
| 2        | M      | 54  | Mid      | Medullary  | 5.0       | I     | T2 | N0 | M0 | IB   | R0     | NA           | NA           | 1  | 1   | 38.93                  |
| 3        | M      | 65  | Mid      | Medullary  | 5.5       | I     | T3 | N0 | M0 | IIA  | R0     | NA           | NA           | 1  | 1   | 7.83                   |
| 4        | F      | 69  | Mid      | Medullary  | 5.0       | I     | T4 | N0 | M0 | -    | R0     | NA           | NA           | 1  | 1   | 8.73                   |
| 5        | M      | 71  | Mid      | Ulcerative | 7.0       | I     | T3 | N0 | M0 | IIA  | R0     | NA           | NA           | 1  | 1   | 38.57                  |
| 6        | M      | 69  | Mid      | Ulcerative | 3.0       | I     | T2 | N0 | M0 | IB   | R0     | NA           | NA           | 1  | 1   | 66.83                  |
| 7        | M      | 67  | Mid      | Ulcerative | 3.5       | I     | T2 | N0 | M0 | IB   | R0     | NA           | NA           | 1  | 1   | 51.67                  |
| 8        | F      | 56  | Proximal | Fungating  | 2.5       | I     | T1 | N0 | M0 | IA   | R0     | 0            | 0            | 0  | 0   | 43.00                  |
| 9        | M      | 56  | Proximal | Ulcerative | 3.0       | I     | T3 | N0 | M0 | IIA  | R0     | 1            | 0            | 1  | 1   | 46.03                  |
| 10       | M      | 70  | Mid      | Ulcerative | 3.5       | I     | T3 | N0 | M0 | IIA  | R0     | 0            | 0            | 1  | 1   | 12.53                  |
| 11       | F      | 66  | Mid      | Medullary  | 1.5       | I     | T3 | N0 | M0 | IIA  | R0     | 0            | 0            | 1  | 1   | 18.90                  |
| 12       | M      | 64  | Distal   | Medullary  | 4.0       | I     | T3 | N0 | M0 | IIA  | R0     | 0            | 0            | 0  | 0   | 34.83                  |
| 13       | M      | 71  | Mid      | Ulcerative | 9.0       | I     | T3 | N0 | M0 | IIA  | R0     | 0            | 0            | 1  | 1   | 5.33                   |
| 14       | F      | 74  | Distal   | Ulcerative | 5.0       | I     | T3 | N1 | M0 | IIIB | R0     | 0            | 0            | 1  | 0   | 29.70                  |
| 15       | M      | 63  | Mid      | Medullary  | 4.5       | I     | T3 | N1 | M0 | IIIB | R0     | 1            | 1            | 1  | 1   | 25.23                  |
| 16       | F      | 68  | Mid      | Ulcerative | 3.0       | I     | T3 | N1 | M0 | IIIB | R0     | 0            | 0            | 1  | 1   | 12.17                  |
| 17       | M      | 56  | Mid      | Ulcerative | 4.0       | I     | T3 | N1 | M0 | IIIB | R0     | 0            | 0            | 0  | 0   | 43.47                  |
| 18       | M      | 70  | Mid      | Ulcerative | 3.5       | I     | T4 | N0 | M0 | -    | R0     | 0            | 0            | 0  | 0   | 38.40                  |
| 19       | M      | 76  | Mid      | Fungating  | 5.5       | I     | T2 | N0 | M0 | IB   | R0     | 1            | 1            | 1  | 1   | 28.87                  |
| 20       | M      | 52  | Mid      | Medullary  | 3.0       | I     | T3 | N1 | M0 | IIIB | R0     | 0            | 0            | 1  | 1   | 4.60                   |
| 21       | F      | 67  | Mid      | Medullary  | 3.0       | I     | T2 | N1 | M0 | IIIA | R0     | NA           | NA           | 1  | 1   | 22.73                  |
| 22       | M      | 71  | Distal   | Medullary  | 5.0       | I     | T3 | N2 | M0 | IIIB | R0     | NA           | NA           | 1  | 0   | 15.13                  |
| 23       | M      | 49  | Distal   | Medullary  | 4.0       | I     | T3 | N2 | M0 | IIIB | R0     | 0            | 0            | 1  | 1   | 11.43                  |
| 24       | M      | 63  | Mid      | Medullary  | 5.0       | II    | T4 | N0 | M0 | -    | R0     | NA           | NA           | 1  | 1   | 11.83                  |
| 25       | F      | 61  | Mid      | Medullary  | 4.3       | I     | T3 | N2 | M0 | IIIB | R0     | 1            | 1            | 1  | 1   | 17.03                  |
| 26       | M      | 61  | Mid      | Fungating  | 4.0       | I     | T2 | N1 | M0 | IIIA | R0     | 0            | 0            | 0  | 0   | 9.33                   |
| 27       | M      | 47  | Mid      | Medullary  | 5.0       | II    | T4 | N0 | M0 | -    | R0     | NA           | NA           | 1  | 1   | 13.07                  |
| 28       | M      | 56  | Mid      | Medullary  | 5.0       | I     | T3 | N3 | M0 | IVA  | R0     | NA           | NA           | 1  | 1   | 27.87                  |
| 29       | M      | 46  | Mid      | Ulcerative | 5.0       | II    | T3 | N0 | M0 | IIB  | R0     | NA           | NA           | 1  | 1   | 64.30                  |
| 30       | M      | 50  | Mid      | Medullary  | 5.0       | II    | T3 | N0 | M0 | IIB  | R0     | NA           | NA           | 1  | 1   | 30.83                  |

| Patients | Gender | Age | Location | Gross        | size (cm) | Grade | pT  | pN | pM | pTNM | Margin | radiotherapy | chemotherapy | OS | DSS | Survival time (months) |
|----------|--------|-----|----------|--------------|-----------|-------|-----|----|----|------|--------|--------------|--------------|----|-----|------------------------|
| 31       | F      | 60  | Mid      | Ulcerative   | 4.0       | II    | T3  | N0 | M0 | IIB  | R0     | NA           | NA           | 1  | 1   | 63.07                  |
| 32       | M      | 65  | Mid      | Ulcerative   | 4.2       | I     | T2  | N3 | M0 | IVA  | R1     | 0            | 0            | 1  | 1   | 23.33                  |
| 33       | M      | 54  | Mid      | Ulcerative   | 5.0       | II    | T3  | N0 | M0 | IIB  | R0     | NA           | NA           | 1  | 1   | 14.30                  |
| 34       | M      | 66  | Mid      | Fungating    | 2.5       | II    | T2  | N0 | M0 | IIA  | R0     | NA           | NA           | 1  | 1   | 17.47                  |
| 35       | M      | 64  | Mid      | Medullary    | 3.0       | II    | T2  | N0 | M0 | IIA  | R0     | NA           | NA           | 1  | 1   | 24.80                  |
| 36       | M      | 51  | Proximal | Medullary    | 4.0       | II    | T3  | N0 | M0 | IIB  | R0     | NA           | NA           | 1  | 1   | 8.20                   |
| 37       | F      | 60  | Distal   | Ulcerative   | 8.0       | II    | T4  | N0 | M0 | -    | R0     | NA           | NA           | 1  | 1   | 20.00                  |
| 38       | M      | 62  | Mid      | Ulcerative   | 7.0       | II    | T4  | N0 | M0 | -    | R0     | 1            | 0            | 1  | 1   | 6.60                   |
| 39       | F      | 60  | Proximal | Ulcerative   | 4.5       | II    | T4  | N0 | M0 | -    | R0     | 0            | 0            | 1  | 1   | 19.33                  |
| 40       | M      | 53  | Mid      | Medullary    | 3.5       | II    | T3  | N0 | M0 | IIB  | R0     | 0            | 0            | 1  | 1   | 20.90                  |
| 41       | M      | 52  | Mid      | Ulcerative   | 5.0       | II    | T4  | N0 | M0 | -    | R0     | 0            | 0            | 1  | 1   | 4.67                   |
| 42       | M      | 70  | Mid      | Ulcerative   | 2.5       | II    | T3  | N0 | M0 | IIB  | R0     | 0            | 0            | 1  | 1   | 35.07                  |
| 43       | M      | 64  | Mid      | Ulcerative   | 4.0       | II    | T3  | N0 | M0 | IIB  | R0     | 0            | 1            | 0  | 0   | 50.20                  |
| 44       | M      | 65  | Mid      | Ulcerative   | 3.0       | II    | T3  | N0 | M0 | IIB  | R0     | 0            | 0            | 0  | 0   | 32.60                  |
| 45       | M      | 63  | Distal   | Ulcerative   | 3.5       | II    | T3  | N0 | M0 | IIB  | R0     | 0            | 0            | 0  | 0   | 14.83                  |
| 46       | M      | 64  | Mid      | Ulcerative   | 4.0       | II    | T4  | N0 | M0 | -    | R0     | 0            | 0            | 1  | 1   | 6.20                   |
| 47       | F      | 55  | Mid      | Ulcerative   | 4.0       | II    | T4  | N0 | M0 | -    | R0     | 1            | 0            | 0  | 0   | 53.60                  |
| 48       | M      | 65  | Proximal | Ulcerative   | 4.0       | II    | T4b | N0 | M0 | IVA  | R1     | 1            | 0            | 1  | 1   | 7.80                   |
| 49       | M      | 60  | Mid      | Ulcerative   | 3.5       | II    | T3  | N0 | M0 | IIB  | R0     | 0            | 0            | 0  | 0   | 18.87                  |
| 50       | F      | 70  | Mid      | Fungating    | 4.5       | II    | T4a | N0 | M0 | IIIB | R0     | 0            | 0            | 0  | 0   | 44.13                  |
| 51       | M      | 52  | Mid      | Constrictive | 4.0       | I     | T4  | N1 | M0 | -    | R0     | 1            | 0            | 1  | 1   | 27.40                  |
| 52       | M      | 61  | Proximal | Medullary    | 5.0       | II    | T4  | N1 | M0 | -    | R0     | NA           | NA           | 1  | 1   | 18.63                  |
| 53       | F      | 55  | Mid      | Medullary    | 4.0       | II    | T3  | N1 | M0 | IIIB | R0     | NA           | NA           | 1  | 1   | 15.10                  |
| 54       | F      | 63  | Distal   | Medullary    | 4.0       | II    | T4  | N1 | M0 | -    | R0     | NA           | NA           | 1  | 1   | 12.97                  |
| 55       | M      | 50  | Mid      | Medullary    | 5.0       | II    | T4  | N1 | M0 | -    | R0     | NA           | NA           | 1  | 1   | 30.83                  |
| 56       | M      | 49  | Mid      | Ulcerative   | 6.0       | II    | T4  | N1 | M0 | -    | R0     | 1            | 0            | 1  | 1   | 15.43                  |
| 57       | M      | 66  | Proximal | Medullary    | 5.0       | II    | T3  | N1 | M0 | IIIB | R0     | NA           | NA           | 1  | 1   | 15.17                  |
| 58       | M      | 64  | Mid      | Ulcerative   | 5.0       | II    | T4a | N1 | M0 | IIIB | R0     | 1            | 1            | 1  | 1   | 9.70                   |
| 59       | M      | 60  | Mid      | Medullary    | 3.5       | II    | T2  | N0 | M0 | IIA  | R0     | 0            | 0            | 1  | 1   | 23.60                  |
| 60       | M      | 48  | Mid      | Medullary    | 5.0       | II    | T3  | N1 | M0 | IIIB | R0     | NA           | NA           | 1  | 1   | 40.97                  |
| 61       | M      | 62  | Proximal | Ulcerative   | 5.3       | II    | T4  | N1 | M0 |      | R0     | 0            | 0            | 1  | 1   | 9.23                   |

| Patients | Gender | Age | Location | Gross        | size (cm) | Grade | pT  | pN | pM | pTNM | Margin | radiotherapy | chemotherapy | OS | DSS | Survival time (months) |
|----------|--------|-----|----------|--------------|-----------|-------|-----|----|----|------|--------|--------------|--------------|----|-----|------------------------|
| 62       | M      | 59  | Mid      | Medullary    | 6.0       | II    | T3  | N1 | M0 | IIIB | R0     | NA           | NA           | 1  | 1   | 23.67                  |
| 63       | M      | 74  | Mid      | Ulcerative   | 4.5       | II    | T4a | N1 | M0 | IIIB | R1     | 0            | 1            | 0  | 0   | 4.53                   |
| 64       | M      | 75  | Mid      | Constrictive | 4.0       | II    | T3  | N1 | M0 | IIIB | R0     | NA           | NA           | 1  | 1   | 18.80                  |
| 65       | M      | 62  | Mid      | Medullary    | 5.0       | II    | T3  | N1 | M0 | IIIB | R0     | NA           | NA           | 1  | 1   | 30.37                  |
| 66       | F      | 66  | Mid      | Ulcerative   | 5.5       | II    | T4a | N1 | M0 | IIIB | R0     | NA           | NA           | 1  | NA  | 13.00                  |
| 67       | M      | 59  | Mid      | Medullary    | 5.0       | II    | T3  | N1 | M0 | IIIB | R0     | NA           | NA           | 1  | 1   | 32.77                  |
| 68       | M      | 72  | Proximal | Medullary    | 3.5       | II    | T2  | N0 | M0 | IIA  | R0     | NA           | NA           | 0  | NA  | 30.00                  |
| 69       | M      | 63  | Distal   | Ulcerative   | 7.0       | II    | T2  | N0 | M0 | IIA  | R0     | 0            | 0            | 0  | 0   | 43.07                  |
| 70       | M      | 63  | Proximal | Medullary    | 5.0       | II    | T2  | N0 | M0 | IIA  | R0     | 1            | 1            | 1  | 1   | 13.23                  |
| 71       | M      | 49  | Proximal | Ulcerative   | 3.0       | III   | T4  | N1 | M0 | -    | R0     | 1            | 1            | 1  | 1   | 23.43                  |
| 72       | M      | 51  | Mid      | Medullary    | 7.0       | I     | T4  | N2 | M0 | IVA  | R0     | NA           | NA           | 1  | 1   | 7.53                   |
| 73       | M      | 55  | Mid      | Medullary    | 5.0       | II    | T3  | N1 | M0 | IIIB | R0     | NA           | NA           | 1  | 1   | 23.33                  |
| 74       | M      | 42  | Mid      | Fungating    | 4.5       | II    | T3  | N1 | M0 | IIIB | R0     | 0            | 1            | 0  | 0   | 53.07                  |
| 75       | M      | 58  | Proximal | Medullary    | 3.0       | II    | T3  | N1 | M0 | IIIB | R0     | 1            | 0            | 0  | 0   | 34.83                  |
| 76       | M      | 53  | Mid      | Ulcerative   | 7.0       | I     | T4  | N2 | M0 | IVA  | R0     | NA           | NA           | 1  | 1   | 9.27                   |
| 77       | M      | 56  | Distal   | Medullary    | 6.0       | I     | T4  | N2 | M0 | IVA  | R0     | NA           | NA           | 1  | 1   | 26.73                  |
| 78       | M      | 68  | Mid      | Ulcerative   | 5.0       | II    | T3  | N1 | M0 | IIIB | R0     | 0            | 0            | 0  | 0   | 32.57                  |
| 79       | M      | 37  | Mid      | Medullary    | 5.0       | I     | T4  | N2 | M0 | IVA  | R0     | 1            | 1            | 1  | 1   | 12.27                  |
| 80       | M      | 49  | Mid      | Medullary    | 5.0       | II    | T2  | N1 | M0 | IIIA | R0     | NA           | NA           | 1  | 1   | 10.47                  |
| 81       | M      | 62  | Distal   | Ulcerative   | 7.5       | I     | T4  | N2 | M0 | IVA  | R0     | 1            | 0            | 1  | 1   | 37.60                  |
| 82       | M      | 64  | Mid      | Ulcerative   | 7.5       | I     | T4  | N2 | M0 | IVA  | R0     | 0            | 1            | 1  | 1   | 19.27                  |
| 83       | M      | 55  | Mid      | Ulcerative   | 3.5       | I     | T4  | N2 | M0 | IVA  | R0     | 0            | 1            | 0  | 0   | 38.73                  |
| 84       | M      | 58  | Mid      | Ulcerative   | 3.8       | II    | T2  | N1 | M0 | IIIA | R0     | NA           | NA           | 1  | NA  | 19.00                  |
| 85       | M      | 51  | Distal   | Ulcerative   | 5.0       | I     | T4a | N2 | M0 | IVA  | R0     | 0            | 1            | 0  | 0   | 36.67                  |
| 86       | M      | 51  | Mid      | Ulcerative   | 2.0       | II    | T2  | N1 | M0 | IIIA | R0     | 0            | 1            | 0  | 0   | 53.90                  |
| 87       | M      | 49  | Mid      | Ulcerative   | 4.0       | II    | T3  | N1 | M0 | IIIB | R0     | 1            | 1            | 1  | 1   | 9.63                   |
| 88       | M      | 56  | Mid      | Ulcerative   | 4.5       | II    | T2  | N1 | M0 | IIIA | R0     | NA           | NA           | 1  | NA  | 18.00                  |
| 89       | M      | 45  | Mid      | Medullary    | 5.0       | II    | T4  | N2 | M0 | IVA  | R0     | NA           | NA           | 1  | 1   | 10.93                  |
| 90       | M      | 51  | Distal   | Ulcerative   | 3.5       | II    | T3  | N1 | NA | -    | R0     | 1            | 0            | 1  | 1   | 14.70                  |
| 91       | M      | 61  | Mid      | Ulcerative   | 4.5       | II    | T4  | N2 | M0 | IVA  | R0     | 0            | 1            | 1  | 1   | 15.83                  |
| 92       | M      | 52  | Mid      | Medullary    | 7.0       | II    | T3  | N1 | NA | -    | R0     | NA           | NA           | 1  | NA  | 19.00                  |

| Patients | Gender | Age | Location | Gross        | size (cm) | Grade | pT | pN | pM | pTNM | Margin | radiotherapy | chemotherapy | OS | DSS | Survival time (months) |
|----------|--------|-----|----------|--------------|-----------|-------|----|----|----|------|--------|--------------|--------------|----|-----|------------------------|
| 93       | F      | 56  | Mid      | Medullary    | 1.2       | II    | T3 | N1 | M0 | IIIB | R0     | 0            | 1            | 0  | 0   | 38.03                  |
| 94       | M      | 52  | Mid      | Ulcerative   | 8.0       | II    | T3 | N2 | M0 | IIIB | R0     | NA           | NA           | 1  | 1   | 18.77                  |
| 95       | F      | 54  | Proximal | Medullary    | 2.5       | II    | T2 | N1 | M0 | IIIA | R0     | 1            | 0            | 1  | 1   | 29.53                  |
| 96       | M      | 40  | Mid      | Medullary    | 6.0       | II    | T3 | N2 | M0 | IIIB | R0     | NA           | NA           | 1  | 1   | 15.63                  |
| 97       | M      | 71  | Mid      | Medullary    | 4.0       | II    | T3 | N2 | M0 | IIIB | R0     | NA           | NA           | 1  | 1   | 57.37                  |
| 98       | F      | 60  | Mid      | Ulcerative   | 4.0       | II    | T4 | N2 | M0 | IVA  | R0     | 1            | 0            | 1  | 1   | 41.20                  |
| 99       | F      | 71  | Mid      | Medullary    | 4.5       | II    | T3 | N2 | NA | -    | R0     | 0            | 0            | 1  | 1   | 32.63                  |
| 100      | F      | 75  | Mid      | Medullary    | 4.0       | II    | T3 | N2 | M0 | IIIB | R0     | 0            | 0            | 1  | 1   | 5.17                   |
| 101      | F      | 66  | Mid      | Medullary    | 1.5       | II    | T2 | N1 | M0 | IIIA | R0     | 0            | 0            | 0  | 0   | 36.90                  |
| 102      | M      | 68  | Mid      | Medullary    | 5.0       | II    | T3 | N3 | M0 | IVA  | R0     | NA           | NA           | 1  | 1   | 7.67                   |
| 103      | M      | 47  | Distal   | Constrictive | 3.0       | III   | T4 | N2 | M0 | IVA  | R0     | 0            | 1            | 1  | 1   | 11.23                  |
| 104      | M      | 59  | Mid      | Medullary    | 6.0       | II    | T3 | N3 | M0 | IVA  | R0     | NA           | NA           | 1  | 1   | 11.93                  |
| 105      | M      | 51  | Mid      | Medullary    | 7.0       | II    | T3 | N3 | M0 | IVA  | R0     | NA           | NA           | 1  | 1   | 42.43                  |
| 106      | M      | 57  | Distal   | Ulcerative   | 3.5       | II    | T3 | N3 | M0 | IVA  | R1     | 0            | 0            | 1  | 1   | 13.83                  |
| 107      | M      | 64  | Distal   | Ulcerative   | 4.2       | II    | T3 | N3 | M0 | IVA  | R0     | 1            | 1            | 1  | 1   | 13.03                  |
| 108      | M      | 44  | Mid      | Medullary    | 6.0       | I     | T4 | N3 | M0 | IVA  | R0     | 1            | 1            | 1  | 1   | 33.80                  |
| 109      | M      | 53  | Mid      | Ulcerative   | 5.0       | II    | T2 | N2 | M0 | IIIB | R0     | NA           | NA           | 1  | 1   | 31.03                  |
| 110      | M      | 60  | Mid      | Medullary    | 4.0       | I     | T1 | N0 | M0 | IA   | R0     | 0            | 0            | 0  | 0   | 23.90                  |
| 111      | M      | 62  | Mid      | Ulcerative   | 6.0       | II    | T3 | N3 | M0 | IVA  | R0     | 1            | 1            | 1  | 1   | 9.90                   |
| 112      | F      | 55  | Mid      | Medullary    | 5.0       | I     | T1 | N0 | M0 | IA   | R0     | 0            | 0            | 0  | 0   | 38.67                  |
| 113      | F      | 63  | Mid      | Medullary    | 3.5       | II    | T3 | N3 | M0 | IVA  | R0     | 1            | 1            | 1  | 1   | 22.07                  |
| 114      | M      | 55  | Mid      | Ulcerative   | 2.0       | III   | T3 | N0 | M0 | IIB  | R0     | NA           | NA           | 1  | 1   | 27.27                  |
| 115      | M      | 51  | Mid      | Medullary    | 5.0       | II    | T2 | N2 | M0 | IIIB | R0     | NA           | NA           | 1  | 1   | 17.47                  |
| 116      | M      | 63  | Proximal | Medullary    | 3.0       | III   | T3 | N0 | M0 | IIB  | R0     | NA           | NA           | 1  | 1   | 23.90                  |
| 117      | M      | 42  | Distal   | Medullary    | 8.0       | II    | T4 | N3 | M0 | IVA  | R0     | NA           | NA           | 1  | 1   | 10.53                  |
| 118      | M      | 46  | Proximal | Medullary    | 4.0       | II    | T2 | N2 | M0 | IIIB | R0     | 1            | 1            | 1  | 1   | 7.90                   |
| 119      | M      | 55  | Mid      | Fungating    | 2.0       | II    | T1 | N0 | M0 | IB   | R0     | NA           | NA           | 1  | 1   | 44.33                  |
| 120      | M      | 65  | Mid      | Ulcerative   | 10.0      | II    | T4 | N3 | M0 | IVA  | R0     | NA           | NA           | 1  | 1   | 10.80                  |
| 121      | M      | 60  | Proximal | Medullary    | 2.0       | II    | T1 | N0 | M0 | IB   | R1     | 0            | 0            | 0  | 0   | 38.43                  |
| 122      | M      | 56  | Mid      | Ulcerative   | 6.5       | II    | T4 | N3 | M0 | IVA  | R0     | 1            | 1            | 1  | 1   | 8.57                   |
| 123      | F      | 58  | Mid      | Medullary    | 2.5       | II    | T1 | N1 | M0 | IIB  | R0     | 0            | 0            | 1  | 1   | 9.23                   |

| Patients | Gender | Age | Location | Gross      | size (cm) | Grade | pT  | pN | pM | pTNM | Margin | radiotherapy | chemotherapy | OS | DSS | Survival time (months) |
|----------|--------|-----|----------|------------|-----------|-------|-----|----|----|------|--------|--------------|--------------|----|-----|------------------------|
| 124      | M      | 53  | Mid      | Ulcerative | 4.0       | III   | T3  | N0 | M0 | IIB  | R0     | 0            | 0            | 1  | 1   | 14.10                  |
| 125      | F      | 48  | Mid      | Medullary  | 2.5       | III   | T3  | N1 | M0 | IIIB | R0     | NA           | NA           | 1  | 1   | 24.77                  |
| 126      | F      | 50  | Mid      | Medullary  | 2.0       | II    | T1  | N0 | M0 | IB   | R0     | 0            | 0            | 0  | 0   | 37.43                  |
| 127      | M      | 64  | Mid      | Medullary  | 2.5       | II    | T1  | N2 | NA | -    | R0     | NA           | NA           | 1  | NA  | 12.00                  |
| 128      | M      | 53  | Mid      | Ulcerative | 4.5       | II    | T2  | N2 | M0 | IIIB | R0     | 0            | 0            | 1  | 1   | 14.37                  |
| 129      | M      | 65  | Mid      | Fungating  | 3.8       | II    | T2  | N3 | M0 | IVA  | R0     | 0            | 0            | 1  | 1   | 22.50                  |
| 130      | M      | 40  | Mid      | Medullary  | 3.0       | III   | T3  | N1 | M0 | IIIB | R0     | NA           | NA           | 1  | 1   | 21.57                  |
| 131      | M      | 75  | Mid      | Medullary  | 5.0       | III   | T2  | N0 | M0 | IIA  | R0     | 0            | 0            | 1  | 1   | 8.63                   |
| 132      | M      | 64  | Distal   | Ulcerative | 7.5       | II    | T4  | N3 | M0 | IVA  | R0     | 0            | 0            | 1  | 1   | 10.03                  |
| 133      | M      | 55  | Mid      | Ulcerative | 5.5       | II    | T4  | N3 | M1 | IVB  | R1     | 0            | 0            | 1  | 1   | 38.13                  |
| 134      | M      | 58  | Distal   | Ulcerative | 4.3       | II    | T4a | N3 | M0 | IVA  | R0     | NA           | NA           | 1  | NA  | 8.00                   |
| 135      | M      | 64  | Proximal | Ulcerative | 4.0       | III   | T3  | N2 | M0 | IIIB | R0     | 1            | 0            | 1  | 1   | 29.80                  |
| 136      | M      | 66  | Mid      | Medullary  | 2.8       | III   | T2  | N1 | M0 | IIIA | R0     | 0            | 0            | 1  | 1   | 40.30                  |
| 137      | F      | 63  | Distal   | Ulcerative | 5.0       | III   | T4  | N3 | M0 | IVA  | R0     | 0            | 0            | 1  | 1   | 15.13                  |

**Table S2. Clinicopathological parameters of ESCC patients in TCGA dataset.**

| Characteristics         | TCGA-ESCC   |                            |                           |         | TCGA-ESCA   |                            |                           |         |
|-------------------------|-------------|----------------------------|---------------------------|---------|-------------|----------------------------|---------------------------|---------|
|                         | Total N (%) | TLR3 <sup>High</sup> N (%) | TLR3 <sup>Low</sup> N (%) | P value | Total N (%) | TLR3 <sup>High</sup> N (%) | TLR3 <sup>Low</sup> N (%) | P value |
| <b>Gender</b>           |             |                            |                           | 0.925   |             |                            |                           | 0.760   |
| Female                  | 12 (15.00)  | 6 (7.50)                   | 6 (7.50)                  |         | 23 (14.38)  | 6 (3.75)                   | 17 (10.63)                |         |
| Male                    | 68 (85.00)  | 33 (41.25)                 | 35 (43.75)                |         | 137 (85.63) | 40 (25.00)                 | 97 (60.63)                |         |
| <b>Age (years)</b>      |             |                            |                           | 0.855   |             |                            |                           | 0.546   |
| < 60                    | 48 (48.18)  | 23 (28.75)                 | 25 (31.25)                |         | 74 (46.25)  | 23 (14.38)                 | 51 (31.88)                |         |
| ≥ 60                    | 32 (40.00)  | 16 (20.00)                 | 16 (20.00)                |         | 86 (53.75)  | 23 (14.38)                 | 63 (39.38)                |         |
| <b>Tumor location</b>   |             |                            |                           | 0.239   |             |                            |                           |         |
| Upper                   | 6 (7.50)    | 3 (3.75)                   | 3 (3.75)                  |         | 6 (3.75)    | 2 (1.25)                   | 4 (2.50)                  | 0.446   |
| Middle                  | 35 (43.75)  | 13 (16.25)                 | 22 (27.50)                |         | 40 (25.00)  | 12 (7.50)                  | 28 (17.50)                |         |
| Lower                   | 38 (47.50)  | 22 (27.50)                 | 16 (20.00)                |         | 113 (70.63) | 31 (19.38)                 | 82 (51.25)                |         |
| Unknown                 | 1 (1.25)    | 1 (1.25)                   | 0 (0.00)                  |         | 1 (0.63)    | 1 (0.63)                   | 0 (0.00)                  |         |
| <b>Tumor grade</b>      |             |                            |                           | 0.697   |             |                            |                           | 0.252   |
| G1                      | 15 (18.75)  | 7 (8.75)                   | 8 (10.00)                 |         | 16 (10.00)  | 5 (3.13)                   | 11 (6.88)                 |         |
| G2                      | 38 (47.50)  | 17 (21.25)                 | 21 (26.25)                |         | 66 (41.25)  | 17 (10.63)                 | 49 (30.63)                |         |
| G3                      | 18 (22.50)  | 9 (11.25)                  | 9 (11.25)                 |         | 43 (26.88)  | 17 (10.63)                 | 26 (16.25)                |         |
| GX                      | 9 (11.25)   | 6 (7.50)                   | 3 (3.75)                  |         | 35 (21.88)  | 7 (4.38)                   | 28 (17.50)                |         |
| <b>pT stage</b>         |             |                            |                           | 0.460   |             |                            |                           | 0.013   |
| I                       | 8 (10.00)   | 3 (3.75)                   | 5 (6.25)                  |         | 27 (16.88)  | 2 (1.25)                   | 25 (15.63)                |         |
| II                      | 27 (33.75)  | 15 (18.75)                 | 12 (15.00)                |         | 37 (23.13)  | 16 (10.00)                 | 21 (13.13)                |         |
| III                     | 40 (50.00)  | 20 (25.00)                 | 20 (25.00)                |         | 76 (47.50)  | 24 (15.00)                 | 52 (32.50)                |         |
| IV                      | 5 (6.30)    | 1 (1.30)                   | 4 (5.00)                  |         | 20 (12.50)  | 4 (2.50)                   | 16 (10.00)                |         |
| <b>pN stage</b>         |             |                            |                           | 0.363   |             |                            |                           | 0.755   |
| N0                      | 45 (56.30)  | 22 (27.50)                 | 23 (28.70)                |         | 65 (40.63)  | 18 (11.25)                 | 47 (29.38)                |         |
| N1                      | 26 (32.50)  | 14 (17.50)                 | 12 (15.00)                |         | 63 (39.38)  | 21 (13.13)                 | 42 (26.25)                |         |
| N2                      | 5 (6.25)    | 2 (2.50)                   | 3 (3.75)                  |         | 10 (6.25)   | 3 (1.88)                   | 7 (4.38)                  |         |
| N3                      | 1 (1.25)    | 1 (1.25)                   | 0 (0.00)                  |         | 6 (3.75)    | 1 (0.63)                   | 5 (3.13)                  |         |
| NX                      | 3 (3.75)    | 0 (0.00)                   | 3 (3.75)                  |         | 16 (10.00)  | 3 (1.88)                   | 13 (8.13)                 |         |
| <b>pM stage</b>         |             |                            |                           | 0.785   |             |                            |                           | 0.856   |
| M0                      | 70 (87.50)  | 34 (42.50)                 | 36 (45.00)                |         | 121 (75.63) | 36 (22.50)                 | 85 (53.13)                |         |
| M1                      | 3 (3.75)    | 1 (1.25)                   | 2 (2.50)                  |         | 9 (5.63)    | 2 (1.25)                   | 7 (4.38)                  |         |
| MX                      | 7 (8.75)    | 4 (5.00)                   | 3 (3.75)                  |         | 30 (18.75)  | 8 (5.00)                   | 22 (13.75)                |         |
| <b>pTNM stage</b>       |             |                            |                           | 0.438   |             |                            |                           | 0.631   |
| I                       | 7 (8.75)    | 5 (6.25)                   | 2 (2.50)                  |         | 17 (10.63)  | 3 (1.88)                   | 14 (8.75)                 |         |
| II                      | 46 (57.50)  | 21 (26.25)                 | 25 (31.25)                |         | 66 (42.50)  | 21 (13.13)                 | 47 (29.38)                |         |
| III                     | 22 (27.50)  | 12 (15.00)                 | 10 (12.50)                |         | 49 (30.63)  | 16 (10.00)                 | 33 (20.63)                |         |
| IV                      | 4 (5.00)    | 1 (1.25)                   | 3 (3.75)                  |         | 8 (5.00)    | 1 (0.63)                   | 7 (4.38)                  |         |
| Unknown                 | 1 (1.25)    | 0 (0.00)                   | 1 (1.25)                  |         | 18 (11.25)  | 5 (3.13)                   | 13 (8.13)                 |         |
| <b>Resection margin</b> |             |                            |                           | 0.617   |             |                            |                           | 0.215   |
| R0 resection            | 65 (81.25)  | 33 (41.25)                 | 32 (40.00)                |         | 121 (75.63) | 35 (21.88)                 | 86 (53.75)                |         |
| R1 resection            | 6 (7.50)    | 3 (3.75)                   | 3 (3.75)                  |         | 13 (8.13)   | 6 (3.75)                   | 7 (4.38)                  |         |
| Unknown                 | 9 (11.25)   | 3 (3.75)                   | 6 (7.50)                  |         | 26 (16.25)  | 5 (3.13)                   | 21 (13.13)                |         |
